# Supplementary material for: Mental imagery in adolescent PTSD patients after child abuse: a comparison with matched healthy controls
Source: Springer Nature journal article supplement (doi:10.1186/s12888-022-03706-8), 2022-01-27
Supplement: MOESM1 [file 12888_2022_3706_MOESM1_ESM.pdf]

## Additional File 1. Exploratory analyses between MI characteristics and psychopathologies in the PTSD group.

Supplementary Table 1. Spearman correlations (Spearman's  $\rho$ ) between the number of comorbidities in the PTSD group and characteristics of negative MI.

|                     | Frequency | Vividness | Mood alteration | Distress | Controllability | Autobiographical association |
|---------------------|-----------|-----------|-----------------|----------|-----------------|------------------------------|
| No of comorbidities | .346      | .187      | -.102           | .241     | -.031           | -.064                        |

Note: \*  $p < .05$ , \*\*significant after Bonferroni-correction: adjusted  $p = .05/6 = .008$ ,  $n$  ranging from 29-27; No of comorbidities = number of comorbidities according to DSM-IV, Mood alteration = mood alteration in response to the negative image, distress= distress caused by the negative image.

Supplementary Table 2. Spearman correlations (Spearman's  $\rho$ ) between the number of comorbidities in the PTSD group and characteristics of positive MI.

|                     | Frequency | Vividness | Mood alteration | Autobiographical association |
|---------------------|-----------|-----------|-----------------|------------------------------|
| No of comorbidities | .054      | .242      | -.281           | .008                         |

Note: \*  $p < .05$ , \*\*significant after Bonferroni-correction: adjusted  $p = .05/4 = .013$ ;  $n = 21$ ; No of comorbidities = number of comorbidities according to DSM-IV, Mood alteration = mood alteration in response to the positive image.

Supplementary Table 3. Spearman correlations (Spearman's  $\rho$ ) between the number of comorbidities in the PTSD group and characteristics of ID images.

|                     | Frequency | Vividness | Mood alteration |
|---------------------|-----------|-----------|-----------------|
| No of comorbidities | -.889*    | .121      | -.606           |

Note: \*  $p < .05$ , \*\*significant after Bonferroni-correction: adjusted  $p = .05/3 = .017$ ;  $n$  ranged from 7-6; No of comorbidities = number of comorbidities according to DSM-IV, Mood alteration = mood alteration in response to the ID image.

Supplementary Table 4. Spearman correlations (Spearman's  $\rho$ ) between abuse characteristics in the PTSD group and characteristics of negative MI.

|                       | Frequency | Vividness | Mood alteration | Distress | Controllability | Autobiographical association |
|-----------------------|-----------|-----------|-----------------|----------|-----------------|------------------------------|
| <b>Physical abuse</b> |           |           |                 |          |                 |                              |
| No of clusters        | .877      | .270      | -.243           | .049     | -.254           | -.051                        |
| Age at onset          | .246      | .154      | -.054           | .083     | -.245           | .377                         |
| Duration              | -.080     | .023      | -.013           | .037     | .073            | -.338                        |
| <b>Sexual abuse</b>   |           |           |                 |          |                 |                              |
| No of cluster         | .137      | .396*     | -.253           | .228     | -.244           | .084                         |
| Age at onset          | -.043     | .280      | .019            | .158     | .119            | .231                         |
| Duration              | .201      | .078      | -.287           | .076     | -.226           | -.354                        |

Note: \*  $p < .05$ , \*\*significant after Bonferroni-correction: adjusted  $p = \frac{.05}{6 \times 6} = .001$ ;  $n$  ranging from 18-28; Mood alteration = mood alteration in response to the negative image, distress= distress caused by the negative image; duration = duration in months.

Supplementary Table 5. Spearman correlations (Spearman's  $\rho$ ) between abuse characteristics in the PTSD and characteristics of positive MI.

|                       | Frequency | Vividness | Mood alteration | Autobiographical association |
|-----------------------|-----------|-----------|-----------------|------------------------------|
| <b>Physical abuse</b> |           |           |                 |                              |
| No of clusters        | -.216     | -.447     | -.156           | -.249                        |
| Age at onset          | .084      | -.340     | -.151           | .010                         |
| Duration              | -.121     | .357      | .100            | .110                         |
| <b>Sexual abuse</b>   |           |           |                 |                              |
| No of clusters        | -.118     | .027      | -.226           | -.110                        |
| Age at onset          | .187      | -.086     | .021            | .056                         |
| Duration              | .080      | .128      | -.111           | .075                         |

Note: \*  $p < .05$ , \*\*significant after Bonferroni-correction: adjusted  $p = \frac{.05}{4 \times 6} = .002$ ,  $n$  ranging from 15-21; Mood alteration = mood alteration in response to the positive image, duration = duration in months.

Supplementary Table 6. Spearman correlations (Spearman's  $\rho$ ) between abuse characteristics in the PTSD group and characteristics of ID images.

|                       | Frequency | Vividness | Mood alteration |
|-----------------------|-----------|-----------|-----------------|
| <b>Physical abuse</b> |           |           |                 |
| No of clusters        | -.188     | .493      | <b>-.985**</b>  |
| Age at onset          | .316      | .800      | -.316           |
| Duration              | -.316     | -.800     | .316            |
| <b>Sexual abuse</b>   |           |           |                 |
| No of clusters        | -.575     | .429      | -.772           |
| Age at onset          | -.031     | .544      | -.411           |
| Duration              | -.216     | .632      | -.822*          |

Note: \*  $p < .05$ , \*\*significant after Bonferroni-correction: adjusted  $p = \frac{.05}{3 \times 6} = .003$ ;  $n$  ranged from 4-7; Mood alteration = mood alteration in response to the ID image, duration = duration in months.

Supplementary Table 7. Pearson's product-moment correlations between PTSD symptoms and characteristics of negative MI in the PTSD group.

|                 | Frequency | Vivid-ness | Mood alteration | Distress | Control-lability | Autobiographical association |
|-----------------|-----------|------------|-----------------|----------|------------------|------------------------------|
| CAPS-CA sum     | .502*     | .162       | -.358           | .402*    | -.273            | -.341                        |
| Re-experiencing | .572**    | .239       | -.333           | .390*    | -.412*           | -.101                        |
| Avoidance       | .433*     | .217       | -.317           | .367     | -.344            | -.295                        |
| Hyperarousal    | .513*     | .084       | -.380*          | .437*    | -.136            | -.349                        |

\*  $p < .05$ , \*\*significant after Bonferroni-correction: adjusted  $p = \frac{.05}{6 \times 4} = .002$ ,  $n$  ranging from 27-29; Mood alteration = mood alteration in response to the negative image, distress= distress caused by the negative image; CAPS-CA = Clinician-Administered PTSD Scale for Children and Adolescents.

Supplementary Table 8. Pearson's product-moment correlations between PTSD symptoms and characteristics of positive MI in the PTSD group.

|                 | Frequency | Vividness | Mood alteration | Autobiographical association |
|-----------------|-----------|-----------|-----------------|------------------------------|
| CAPS-CA sum     | .084      | .266      | -.592*          | .109                         |
| Re-experiencing | .219      | -.119     | -.169           | -.003                        |
| Avoidance       | .106      | .294      | -.615*          | .014                         |
| Hyperarousal    | -.052     | .253      | -.535*          | .210                         |

Note: \*  $p < .05$ , \*\*significant after Bonferroni-correction: adjusted  $p = \frac{.05}{4*4} = .003$ ,  $n = 21$ ; Mood alteration = mood alteration in response to the positive image, CAPS-CA = Clinician-Administered PTSD Scale for Children and Adolescents.

Supplementary Table 9. Pearson's product-moment correlations between PTSD symptoms and characteristics of ID images in the PTSD group.

|                 | Frequency | Vividness | Mood alteration |
|-----------------|-----------|-----------|-----------------|
| CAPS-CA sum     | -.184     | .423      | -.887*          |
| Re-experiencing | -.329     | .414      | -.779           |
| Avoidance       | -.325     | .472      | -.838*          |
| Hyperarousal    | .195      | .223      | -.758           |

Note: \*  $p < .05$ , \*\*significant after Bonferroni-correction: adjusted  $p = \frac{.05}{3*4} = .004$ ,  $n$  ranged from 6-7; Mood alteration = mood alteration in response to the ID image, duration = duration in months. CAPS-CA = Clinician-Administered PTSD Scale for Children and Adolescents
